# Supplementary material
Source: PubMed Central journal article supplement (PMC5656385)
Supplement: NIHMS871633-supplement.pdf [file NIHMS871633-supplement.pdf]

## **Supplementary information**

### **Long-term effects of bariatric surgery in patients with obesity and chromosome 16p11.2 microdeletion**

Felipe M. Kristensson, Johanna C. Andersson-Assarsson, Noora Kanerva, Markku Peltonen, Björn Carlsson and Lena M.S. Carlsson

**Supplemental figures: 1 (color)**

**Supplemental tables: 2**

#### **FIGURE LEGENDS**

**Supplementary figure 1.** Estimated means from mixed-models with 95% confidence intervals for blood glucose (a), serum insulin (b), total and HDL cholesterol (c) and systolic and diastolic blood pressure (d) in carriers and non-carriers of the 16p11.2 microdeletion followed for 10 years after bariatric surgery in the SOS study. Dashed lines represent carriers of the 16p11.2 deletion while solid lines represent non-carriers.

#### **TABLES**

**Supplementary table 1.** Detailed follow-up information. Number of patients available and number of patients actually seen at each follow-up examination.

**Supplementary table 2.** Mean weight at baseline, 1 and 10 years' follow-up in carriers of the 16p11.2 microdeletion grouped by surgery type.

**Supplementary figure 1.** Estimated means from mixed-models with 95% confidence intervals for blood glucose (a), serum insulin (b), total and HDL cholesterol (c) and systolic and diastolic blood pressure (d) in carriers and non-carriers of the 16p11.2 microdeletion followed for 10 years after bariatric surgery in the SOS study. Dashed lines represent carriers of the 16p11.2 microdeletion while solid lines represent non-carriers.

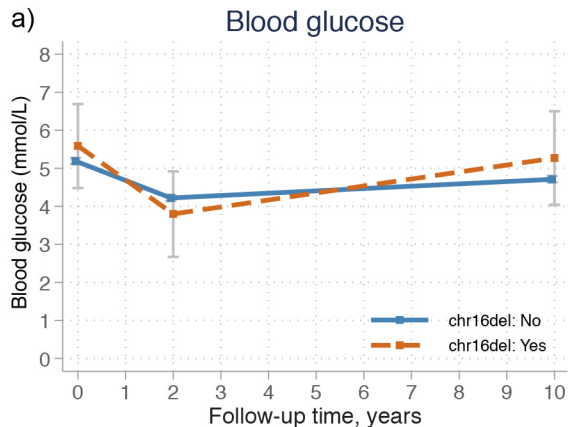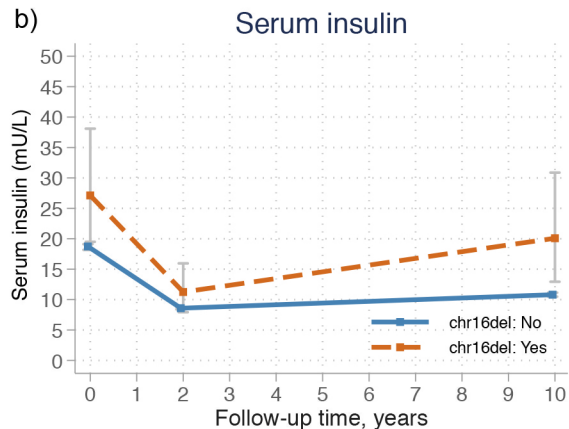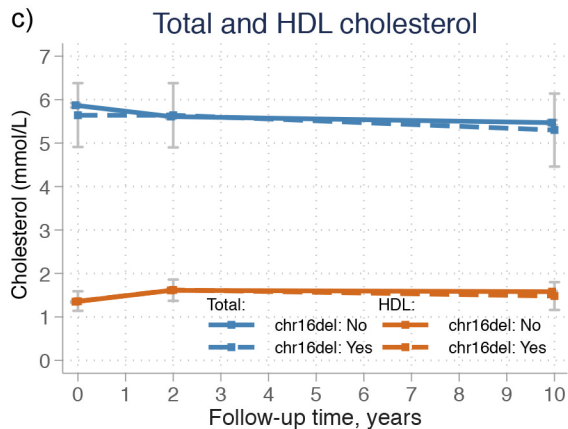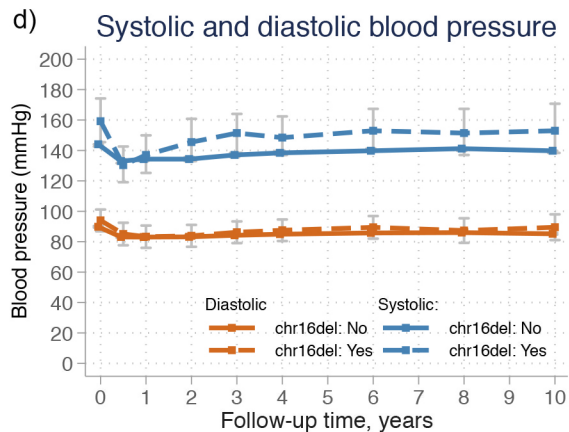

**Supplementary table 1.** Detailed follow-up information in carriers and non-carriers of the chromosome 16p11.2 microdeletion

|          | <b>Carriers</b> |      | <b>Non-carriers</b> |      |
|----------|-----------------|------|---------------------|------|
|          | Available*      | Seen | Available*          | Seen |
| Baseline | 9               | 9    | 1834                | 1834 |
| Year 1   | 8               | 8    | 1812                | 1744 |
| Year 2   | 8               | 8    | 1797                | 1696 |
| Year 3   | 8               | 8    | 1773                | 1539 |
| Year 4   | 8               | 8    | 1751                | 1521 |
| Year 6   | 8               | 7    | 1732                | 1439 |
| Year 8   | 7               | 6    | 1702                | 1374 |
| Year 10  | 7               | 6    | 1701                | 1401 |

\* Numbers are adjusted for mortality

**Supplementary table 2.** Mean weight at baseline, 1 and 10 years' follow-up in carriers of the 16p11.2 microdeletion grouped by surgery type. Number of individuals are presented in brackets.

|                 | <b>Baseline</b> | <b>1 year</b> | <b>10 years</b> |
|-----------------|-----------------|---------------|-----------------|
| VBG, kg (n)     | 118 (4)         | 80.4 (4)      | 110 (4)         |
| Banding, kg (n) | 130 (3)         | 93.7 (3)      | 90.0 (1)        |
| GBP, kg (n)     | 128 (2)         | 80 (1)        | 93.2 (1)        |

Abbreviations: VBG - vertical banded gastroplasty,  
GBP - gastric bypass
